# Supplementary material for: The Small Molecule Components of Human Synovial Fluid and Bovine Calf Serum that Correlate with Cobalt Chrome (CoCrMo) Wear
Source: Research Square preprint supplement (doi:10.21203/rs.3.rs-921974/v1), 2021-09-24
Supplement: Supplementary file 1 [file 1f2391147354cee9f1c29c67.docx]

| **Sample ID** | **AWD R1** | **AWD R2** | **AWD R3** | **Mean AWD** |
| --- | --- | --- | --- | --- |
| 041 - HSF | 0.46 | 0.7 |  | 0.58 |
| Batch 1 - BCS | 0.65 |  |  | 0.65 |
| Batch 2 – BCS | 0.65 |  |  | 0.65 |
| 077 – HSF | 0.80 | 0.81 |  | 0.81 |
| 110 – HSF | 1.00 |  |  | 1.00 |
| 113 – HSF | 0.59 |  |  | 0.59 |
| 135 – HSF | 0.78 | 0.97 | 0.91 | 0.89 |
| 145 – HSF | 0.93 |  |  | 0.93 |
| 156 – HSF | 0.90 |  |  | 0.90 |
| 164 - HSF | 1.03 |  |  | 1.03 |
